# Supplementary material
Source: Royal Society of Chemistry journal article supplement (doi:10.1039/d6ta02037b)
Supplement: d6ta02037b1.pdf [file d6ta02037b1.pdf]

## Supplement Materials

### Coordination-Layer Engineering of Pt Single Atoms on h-BN for Propane Dehydrogenation via a p-Band Descriptor Validated by Multiscale Modeling and Knowledge-Informed Machine Learning

HuiJie Wang<sup>a#</sup>, WeiHang Xu<sup>a#</sup>, XiaoYing Sun<sup>a\*</sup>, JiaXin Sun<sup>a</sup>, Ji Qi<sup>a</sup>, Zhen Zhao<sup>a,b</sup>, Bo Li<sup>a\*</sup>

<sup>a</sup>Institute of Catalysis for Energy and Environment, College of Chemistry and Chemical Engineering, Shenyang Normal University, Shenyang 110034, China

<sup>b</sup>State Key Laboratory of Heavy Oil Processing, China University of Petroleum, Beijing, 102249, China

Corresponding Authors:

\* B. Li: boli@synu.edu.cn

\* X.Y. Sun: sunxiaoying78@163.com

#: equally contribution

**Table S1.** Summary of Key Calculated Properties for Pt/V<sub>B</sub> and Pt/V<sub>N</sub> series Catalysts.

| Catalyst              | Formation Energy, E <sub>f</sub> (eV) | Bader Charge on Pt, Pt(e) | Average p-band (eV) | Average ICOHP (eV) |
|-----------------------|---------------------------------------|---------------------------|---------------------|--------------------|
| Pt/V <sub>B</sub>     | 0.17                                  | +0.68                     | -4.626              | -3.43              |
| Pt/V <sub>B</sub> -C1 | 0.21                                  | +0.59                     | -3.791              | -3.56              |
| Pt/V <sub>B</sub> -C2 | 0.26                                  | +0.44                     | -2.775              | -3.57              |
| Pt/V <sub>B</sub> -C3 | 0.31                                  | +0.33                     | -1.986              | -3.69              |
| Pt/V <sub>N</sub>     | 0.17                                  | -1.04                     | -4.151              | -3.23              |
| Pt/V <sub>N</sub> -C1 | 0.19                                  | -0.74                     | -4.317              | -3.23              |
| Pt/V <sub>N</sub> -C2 | 0.21                                  | -0.24                     | -4.773              | -3.87              |
| Pt/V <sub>N</sub> -C3 | 0.24                                  | -0.18                     | -5.435              | -3.9               |

**Table S2.** Hyperparameter Search Space and Optimal Configuration

| Model        | Hyperparameter Search Space                                                                                                                 | B-series Optimal                                            | N-series Optimal                                         |
|--------------|---------------------------------------------------------------------------------------------------------------------------------------------|-------------------------------------------------------------|----------------------------------------------------------|
| PhysFormer   | hidden $\in \{16, 32\}$ ,<br>depth $\in \{2, 3\}$ ,<br>dropout $\in \{0, 0.2\}$ , lr<br>$\in \{3e-3, 5e-3\}$ , wd $\in$<br>$\{1e-3, 2e-2\}$ | hidden=32,<br>depth=3,<br>dropout=0.2, lr=5e-<br>3, wd=1e-3 | hidden=16,<br>depth=2,<br>dropout=0, lr=3e-3,<br>wd=2e-2 |
| RandomForest | n_estimators $\in \{100,$<br>200, 300},<br>max_depth $\in \{3, 4, 5,$<br>6}                                                                 | n_estimators=300,<br>max_depth=4                            | n_estimators=200,<br>max_depth=5                         |
| XGBoost      | max_depth $\in \{2, 3,$<br>4}, learning_rate $\in$<br>$\{0.01, 0.05, 0.1\}$ ,<br>n_estimators=500                                           | max_depth=4,<br>lr=0.01                                     | max_depth=2,<br>lr=0.01                                  |
| Ridge        | $\alpha = 1.0$ , with<br>additional inverse<br>temperature feature<br>1/T                                                                   | —                                                           | —                                                        |

**Table S3. Model Performance Comparison**

| Series | Model        | Train R <sup>2</sup> | LOCO R <sup>2</sup> |
|--------|--------------|----------------------|---------------------|
| B      | PhysFormer   | 0.98                 | <b>0.94</b>         |
| B      | RandomForest | 0.99                 | 0.90                |
| B      | XGBoost      | 0.99                 | 0.86                |
| B      | Ridge        | 0.02                 | -0.01               |
| N      | PhysFormer   | 0.99                 | <b>0.96</b>         |
| N      | RandomForest | 0.99                 | 0.95                |
| N      | XGBoost      | 0.99                 | 0.93                |
| N      | Ridge        | 0.00                 | 0.00                |

**Table S4. Parameters for RMG input files.**

| Property                                       | Value                                                                          |
|------------------------------------------------|--------------------------------------------------------------------------------|
| Temperatures                                   | 600-1000 K                                                                     |
| nSim                                           | 7                                                                              |
| Pressure                                       | 1 bar                                                                          |
| Active site                                    | Pt                                                                             |
| Surface site density                           | $2.943 \times 10^{-5}$ , mol/m <sup>2</sup>                                    |
| Specific surface area                          | $1 \times 10^5$ m <sup>2</sup> m <sup>-3</sup>                                 |
| toleranceMoveToCore, $\epsilon_{\text{core}}$  | $1 \times 10^{-1}$                                                             |
| toleranceKeepInEdge, $\epsilon_{\text{core}}$  | 0                                                                              |
| terminationRateRatio, $\epsilon_{\text{rate}}$ | $1 \times 10^{-7}$                                                             |
| toleranceInterruptSimulation,                  | $1 \times 10^8$                                                                |
| maximumSurfaceSites                            | 1                                                                              |
| maximumEdgeSpecies                             | 500000                                                                         |
| Initial composition                            | 10 % C <sub>3</sub> H <sub>8</sub> , 10 % H <sub>2</sub> , 80 % N <sub>2</sub> |
| Initial coverage                               | Vacant site fraction = 1.0                                                     |

**Table S5.** Calculated first C-H bond activation energy barriers ( $E_a$ ) for propane and corresponding Turnover Frequencies (TOFs) at 800 K and 1 bar on catalysts with different local coordination environments.

| Catalyst Model        | Pt Substitution Site | No. of Neighboring C Atoms | $E_a$ (eV) | TOF (s <sup>-1</sup> ) |
|-----------------------|----------------------|----------------------------|------------|------------------------|
| Pt/V <sub>B</sub>     | B                    | 0                          | 0.31       | 11.59                  |
| Pt/V <sub>B</sub> -C1 | B                    | 1                          | 0.53       | 9.49                   |
| Pt/V <sub>B</sub> -C2 | B                    | 2                          | 0.70       | 6.94                   |
| Pt/V <sub>B</sub> -C3 | B                    | 3                          | 0.96       | 4.93                   |
| Pt/V <sub>N</sub>     | N                    | 0                          | 0.86       | 5.57                   |
| Pt/V <sub>N</sub> -C1 | N                    | 1                          | 0.67       | 7.60                   |
| Pt/V <sub>N</sub> -C2 | N                    | 2                          | 0.61       | 8.58                   |
| Pt/V <sub>N</sub> -C3 | N                    | 3                          | 0.55       | 9.53                   |

**Table S6.** Gibbs free energy for activation of the first C-H bond in each catalyst at 800 K.

| Catalyst Model        | Gibbs free energy (eV) |
|-----------------------|------------------------|
| Pt/V <sub>B</sub>     | 0.2                    |
| Pt/V <sub>B</sub> -C1 | 0.45                   |

|                       |      |
|-----------------------|------|
| Pt/V <sub>B</sub> -C2 | 0.46 |
| Pt/V <sub>B</sub> -C3 | 0.79 |
| Pt/V <sub>N</sub>     | 0.61 |
| Pt/V <sub>N</sub> -C1 | 0.53 |
| Pt/V <sub>N</sub> -C2 | 0.44 |
| Pt/V <sub>N</sub> -C3 | 0.34 |

**Table S7.** LOCO cross-validation performance of PhysFormer and baseline models on the B and N catalyst series. Train R<sup>2</sup> and Test R<sup>2</sup> are bootstrap-resampled means; 95% CI denotes the bootstrap confidence interval.

| Series | Model        | Train R <sup>2</sup> | Train 95% CI  | Test R <sup>2</sup> | Test 95% CI   |
|--------|--------------|----------------------|---------------|---------------------|---------------|
| B      | PhysFormer   | 0.98                 | [0.95, 0.98]  | 0.94                | [0.87, 0.97]  |
| B      | RandomForest | 0.99                 | [0.97, 0.99]  | 0.90                | [0.79, 0.95]  |
| B      | XGBoost      | 0.99                 | [0.98, 0.99]  | 0.86                | [0.67, 0.96]  |
| B      | Ridge        | 0.02                 | [-0.30, 0.09] | -0.01               | [-0.34, 0.09] |
| N      | PhysFormer   | 0.99                 | [0.98, 0.99]  | 0.96                | [0.94, 0.98]  |
| N      | RandomForest | 0.99                 | [0.98, 0.99]  | 0.95                | [0.90, 0.98]  |
| N      | XGBoost      | 0.99                 | [0.98, 0.99]  | 0.93                | [0.88, 0.97]  |
| N      | Ridge        | 0.004                | [-0.34, 0.05] | 0.001               | [-0.35, 0.04] |

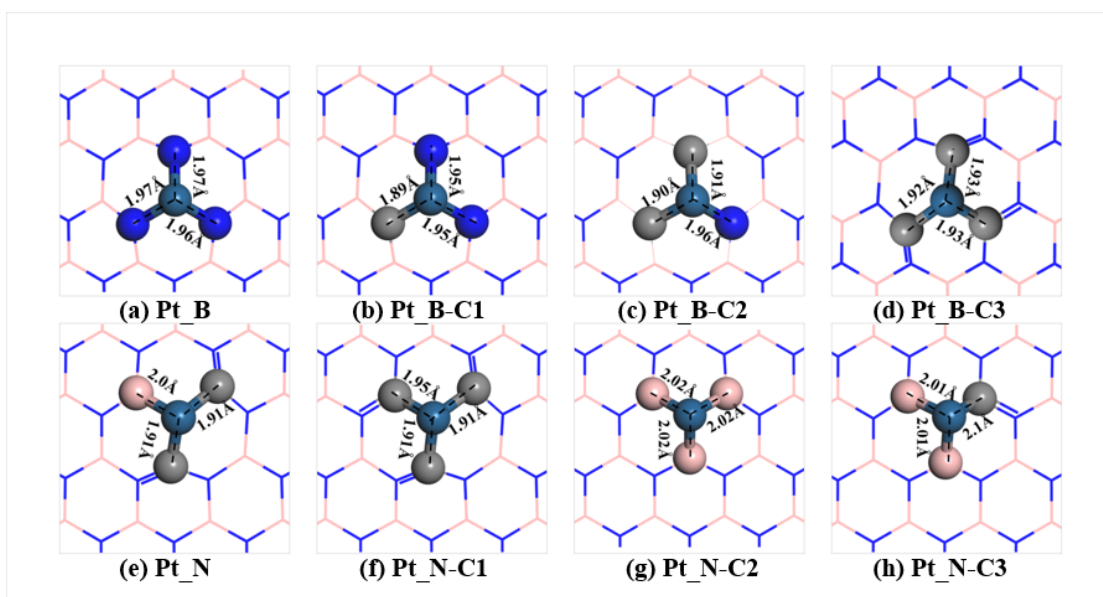

**Figure S1.** Optimized geometric structures of the Pt/V<sub>B</sub> and Pt/V<sub>N</sub> series single-atom catalyst models. Bond lengths are given in angstroms (Å). Blue, pink, gray, and light teal spheres represent nitrogen, boron, carbon, and platinum atoms, respectively.

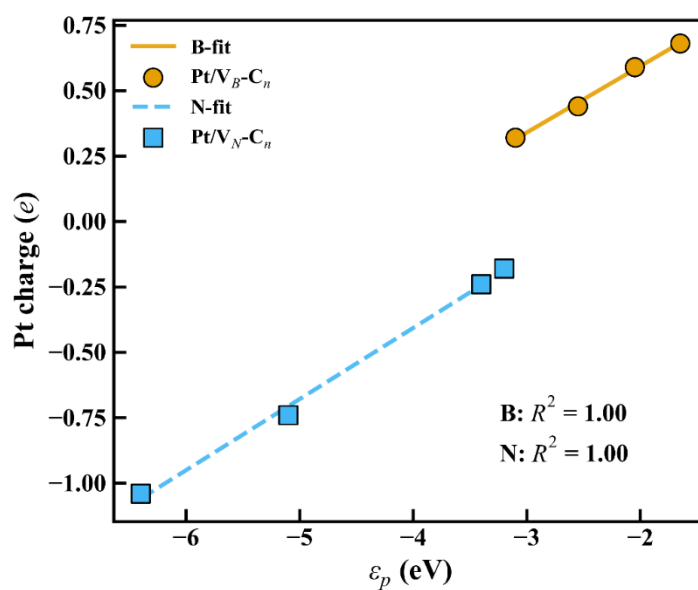

**Figure S2.** Correlation between the Bader charge of the Pt single atom the center-of-mass energy of the p orbital of the adjacent atom ( $\epsilon_p$ ).

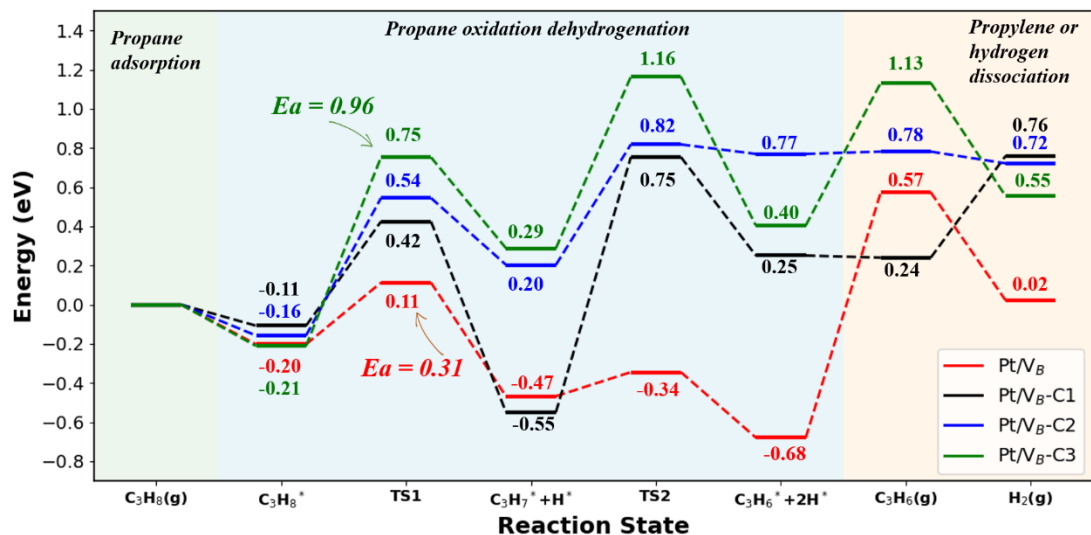

**Figure S3.** Calculated energy pathways for propane dehydrogenation on the Pt/V<sub>B</sub> series catalysts. Energies are relative to the gas-phase propane molecule and the clean catalyst surface. TS1 and TS2 denote the transition states for the first and second C-H bond cleavage, respectively.

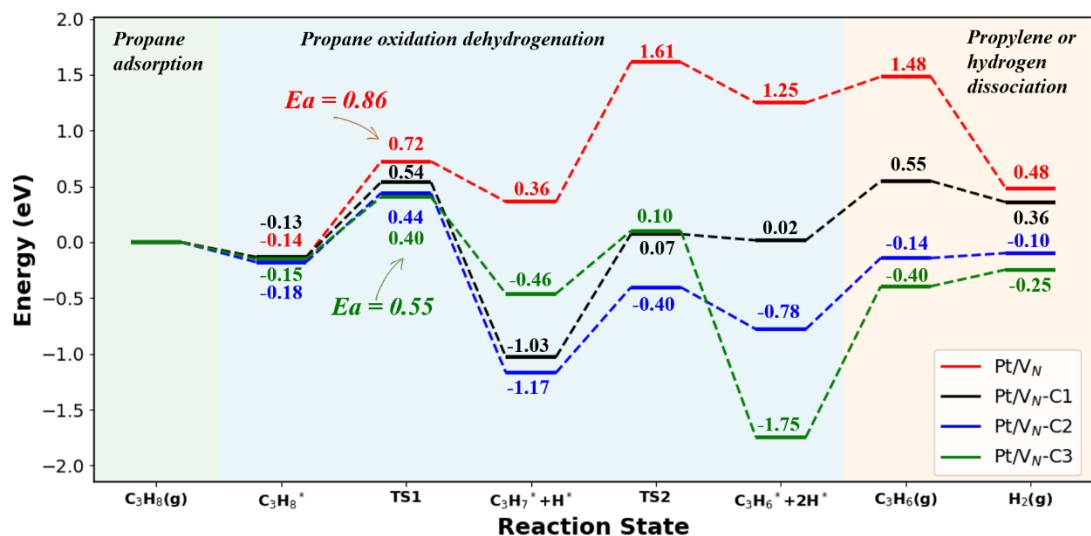

**Figure S4.** Calculated energy pathways for propane dehydrogenation on the Pt/V<sub>N</sub> series catalysts. Energies are relative to the gas-phase propane molecule and the clean catalyst surface. TS1 and TS2 denote the transition states for the first and second C-H bond cleavage, respectively.

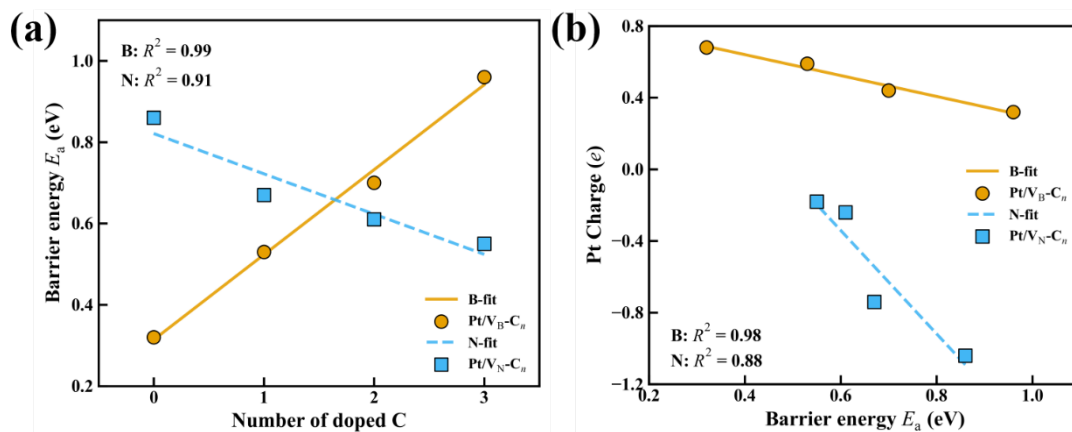

**Figure S5.** (a) Relationship between the barrier energy of the first C-H bond cleavage ( $E_a$ ) and the number of coordinating carbon atoms ( $n$ ). (b) Correlation between the barrier energy of the first C-H bond cleavage ( $E_a$ ) and Bader charge of the Pt single atom

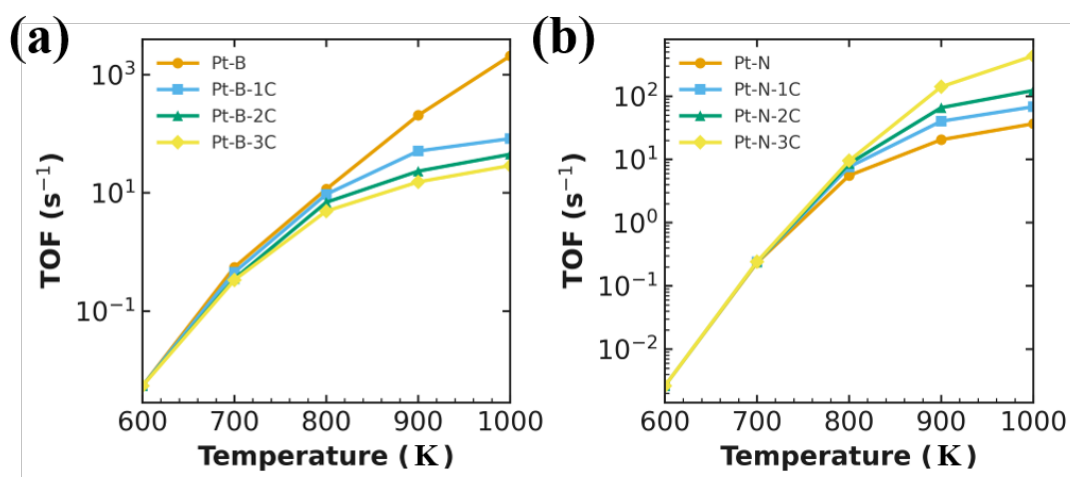

**Figure S6.** (a) Arrhenius plots showing the temperature dependence of the turnover frequency (TOF) for the Pt/ $V_B$  series catalysts at a constant pressure of 1 bar. (b) Arrhenius plots showing the temperature dependence of the turnover frequency (TOF) for the Pt/ $V_N$  series catalysts at a constant pressure of 1 bar.

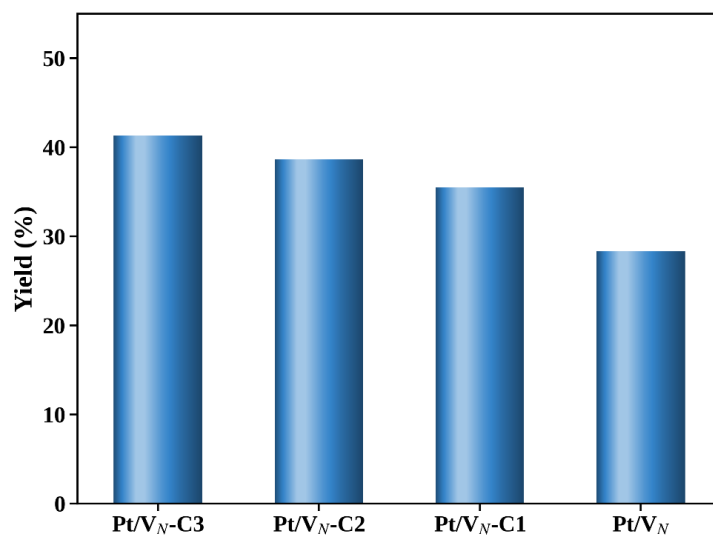

**Figure S7.** Plug-flow reactor predictions (Cantera, 800 K and 1 bar) comparison of Pt/V<sub>N</sub>, Pt/V<sub>N</sub>-C1, Pt/V<sub>N</sub>-C2 and Pt/V<sub>N</sub>-C3: propylene yield bar chart.

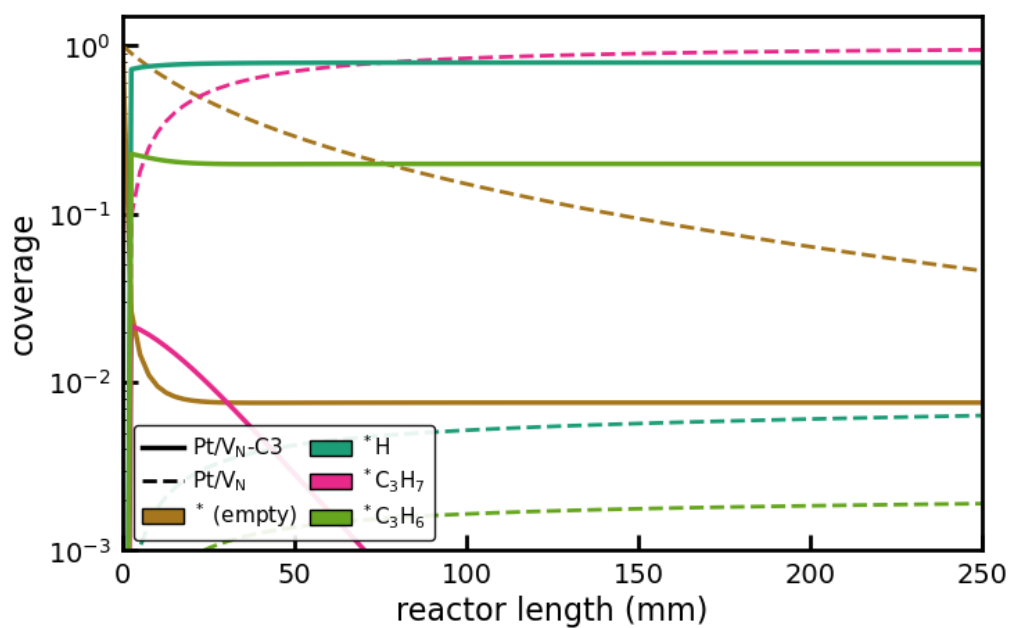

**Figure S8.** Cantera plug-flow simulation at 800 K and 1 bar comparing Pt/V<sub>N</sub>: solid lines and Pt/V<sub>N</sub>-C3: dashed lines: Corresponding surface coverages of vacant sites and key intermediates as functions of reactor length.

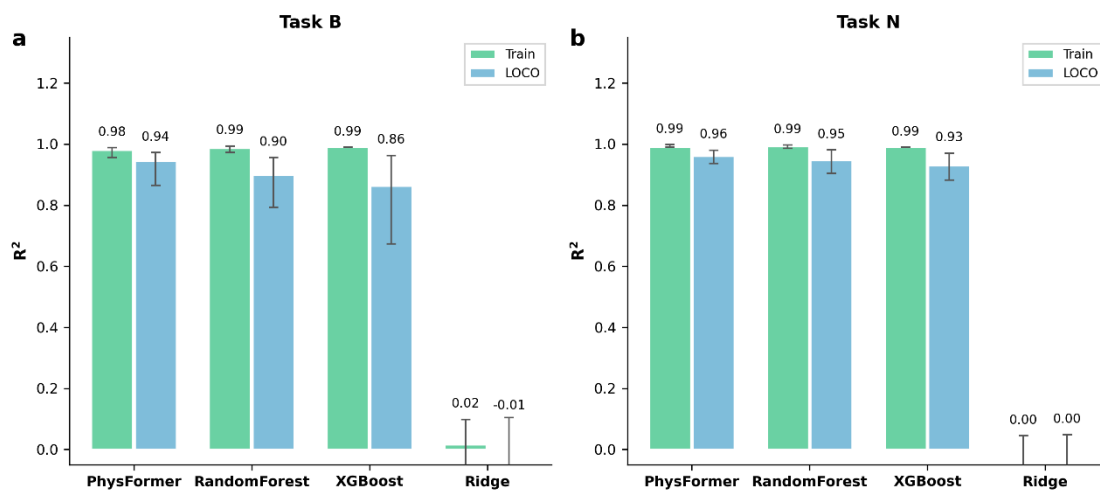

**Figure S9.** Model performance comparison for Pt/V<sub>B</sub> and Pt/V<sub>N</sub> series. Training (green) and leave-one-out cross-validation (blue) R<sup>2</sup> values across four models. PhysFormer achieves the best generalization performance (LOCO R<sup>2</sup> = 0.94–0.96) with minimal overfitting, outperforming tree-based ensembles and linear baselines.

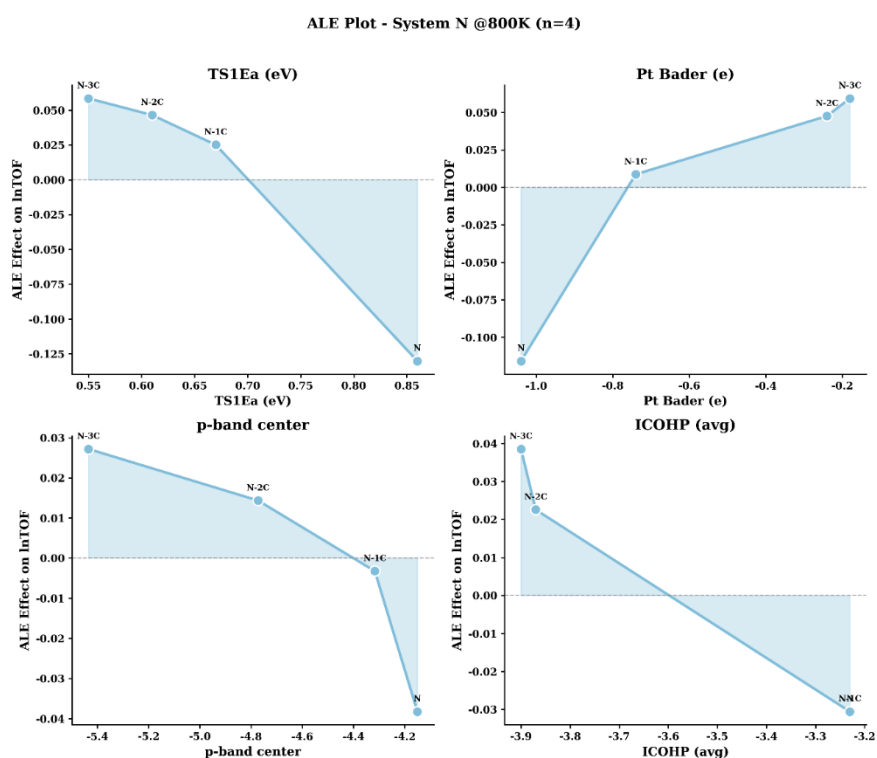

**Figure S10.** Accumulated local effects (ALE) analysis of the PhysFormer model for the Pt/V<sub>B</sub> series at 800 K.

ALE Plot - System B @800K (n=4)

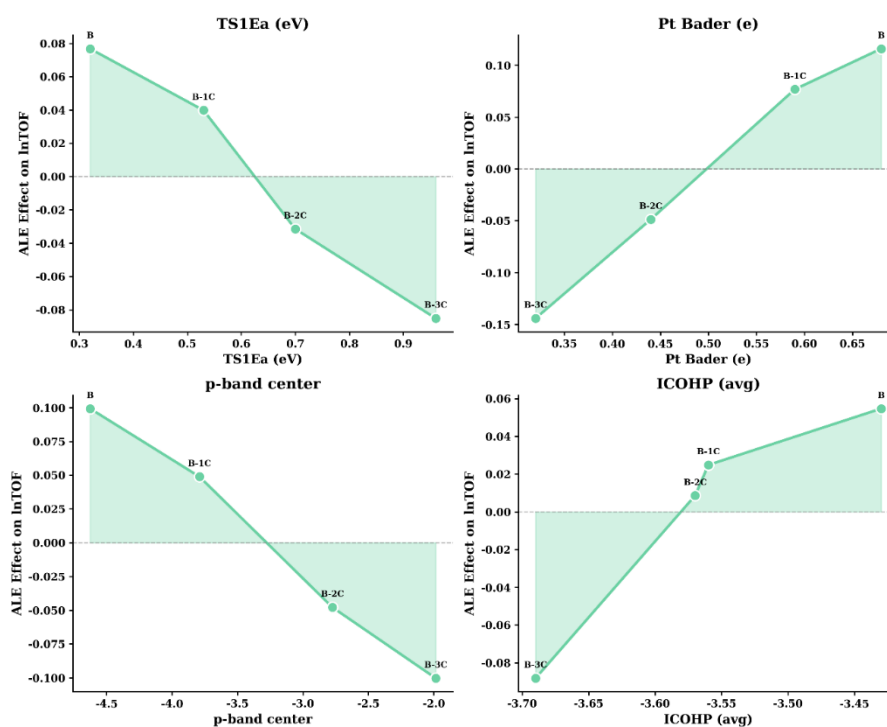

**Figure S11.** Accumulated local effects (ALE) analysis of the PhysFormer model for the Pt/V<sub>N</sub> series at 800 K.

## S1. PhysFormer Physical Constraint Design

To ensure physical plausibility of temperature response, this work imposes a sign constraint on the slope head  $b(\mathbf{x})$ :

$$b(\mathbf{x}) = -\text{softplus}(b_{\text{raw}})$$

This transformation enforces  $b(\mathbf{x}) < 0$ , ensuring that predicted values change monotonically with the inverse temperature variable  $\tilde{u} = 1/T$ , structurally avoiding non-physical phenomena such as temperature trend reversal under small-sample conditions.

Considering that real catalytic systems may deviate from ideal Arrhenius behavior (due to factors such as diffusion limitations, competitive adsorption, etc.), the model introduces a discrete temperature bias term  $g(T)$  with a ‘‘cumulative increment’’ monotonic parameterization design: using the lowest temperature point (600 K) bias as zero baseline, biases for remaining temperature points are generated by cumulative summation of 4 non-negative increments (constrained by softplus):

$$g(T_k) = \sum_{i=1}^k \text{softplus}(\delta_i), \quad k = 1, 2, 3, 4; \quad g(T_0) = 0$$

This design absorbs systematic temperature deviations while maintaining overall monotonic trends, and reduces non-identifiability between the baseline head  $a(\mathbf{x})$  and temperature bias term. Whether to enable the temperature bias module is automatically determined through LOCO cross-validation.

## S2. Hyperparameter Search Space

To ensure fair comparison, all models undergo hyperparameter optimization via LOCO-based grid search. Table S2 lists the search space and optimal configuration for each model.

## S3. PhysFormer Network Architecture and Training Details

PhysFormer is built upon a multilayer perceptron (MLP), with each Trunk network layer containing Linear, LayerNorm, GELU, and Dropout modules. Input dimension is 4 (TS1Ea, Pt Bader charge, p-band center, ICOHP average), outputting to a dual-head structure. Additionally, a wide branch is introduced to establish direct linear connections from raw input, enhancing fitting capability for simple relationships.

Training employs Huber loss ( $\beta = 0.5$ ), which is more robust to outliers compared to MSE. The optimizer is AdamW, combined with early stopping strategy (patience = 200 epochs, maximum 2000 epochs). Gradient clipping threshold is 1.0. Input descriptors are standardized and truncated to  $\pm 4$  standard deviation range. The inverse temperature variable is normalized with 600 K as the reference point.

#### S4. Reliability Validation of PhysFormer under Small-Sample Conditions

To evaluate the generalization capability of PhysFormer under small-sample conditions, we employed a Leave-One-Catalyst-Out (LOCO) cross-validation strategy on a dataset of only 20 samples (4 catalysts  $\times$  5 temperatures). PhysFormer was systematically compared with XGBoost, RandomForest, and Ridge regression, and 95% confidence intervals were estimated via 1,000 bootstrap resamples.

In the Pt/V<sub>B</sub> series, PhysFormer achieved a LOCO test  $R^2$  of 0.94 (95% CI: [0.87, 0.97]), outperforming RandomForest (0.90, CI: [0.79, 0.95]) and XGBoost (0.86, CI: [0.67, 0.96]). In the Pt/V<sub>N</sub> series, PhysFormer again ranked highest with a LOCO test  $R^2$  of 0.96 (95% CI: [0.94, 0.98]), surpassing RandomForest (0.95, CI: [0.90, 0.98]) and XGBoost (0.93, CI: [0.88, 0.97]). Ridge regression failed to produce meaningful fits in either series ( $R^2 \approx 0$ ).

Notably, PhysFormer not only achieved the highest LOCO  $R^2$  in both series but also exhibited the smallest bootstrap standard deviation (0.029 for Pt/V<sub>B</sub> series; 0.012 for Pt/V<sub>N</sub> series), indicating high prediction stability across different catalyst partitions. In contrast, XGBoost attained a perfect training  $R^2$  of 0.99 yet showed a substantial drop in test  $R^2$  with a considerably wider confidence interval (Pt/V<sub>B</sub> series CI width: 0.29 vs. 0.10 for PhysFormer), exhibiting clear signs of overfitting. The small train-test  $R^2$  gap of PhysFormer ( $\Delta = 0.04$  for Pt/V<sub>B</sub> series;  $\Delta = 0.03$  for Pt/V<sub>N</sub> series) further confirms its strong generalization without severe overfitting under small-sample conditions.

These results demonstrate that, by incorporating physical prior knowledge, PhysFormer achieves accurate and robust predictions under the stringent setting of small-sample, leave-one-catalyst-out validation, significantly outperforming conventional machine-learning approaches.
